# Supplementary material for: NapA Mediates a Redox Regulation of the Antioxidant Response, Carbon Utilization and Development in Aspergillus nidulans
Source: PubMed Central journal article supplement (PMC5371717; doi:10.3389/fmicb.2017.00516), 2017-03-30
Supplement: Image5.pdf [file Image5.pdf]

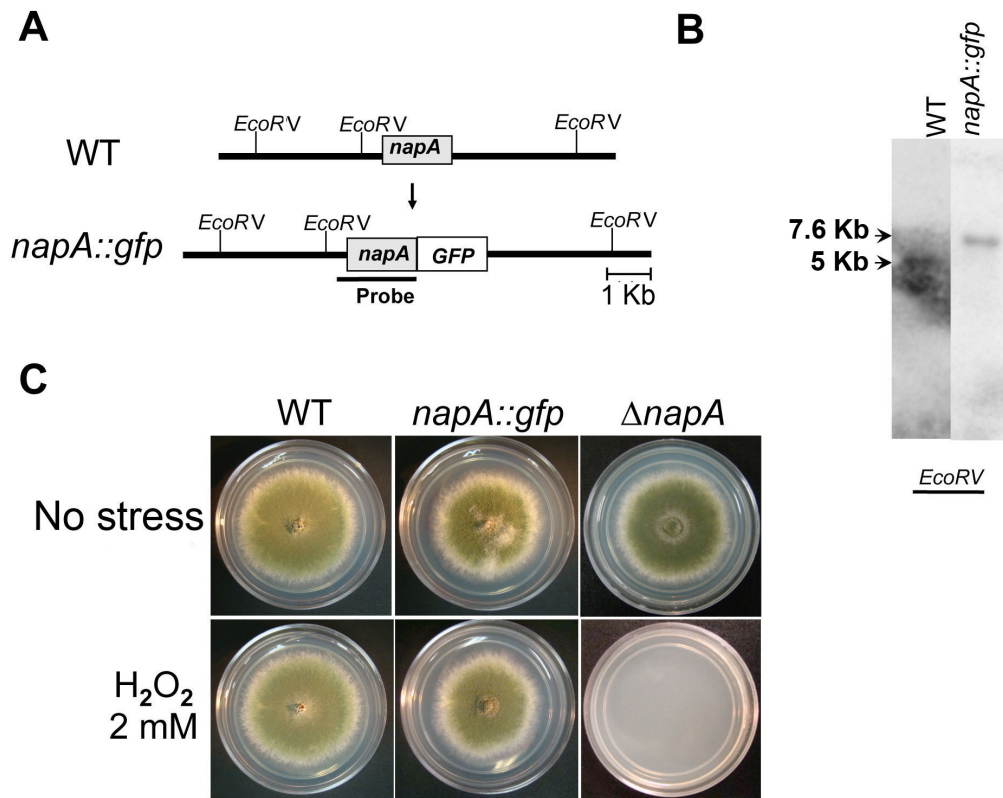

**FIGURE S5. GFP tagging does not affect NapA function.** (A) Three PCR products were used to generate an AtfA C-terminal GFP construct by double joint PCR, which was used to transform strain A1155. (B) Total DNA from strains A1155 (WT) and PyrG<sup>+</sup> transformant TFL14 were digested with *EcoRV* restriction enzyme and used for Southern blot analysis using *napA* ORF as probe. The WT pattern corresponds to a 5 Kb band, while *napA::GFP* pattern corresponds to a 7.6 Kb fragment. H<sub>2</sub>O<sub>2</sub> resistance of WT and *napA::GFP* strains is similar. (C) Conidiospores (1X10<sup>4</sup>) from strains A1155 (WT), TFL9 ( $\Delta napA$ ) and TFL14 (*napA::GFP*) were inoculated on supplemented MM plates with or without 2 mM H<sub>2</sub>O<sub>2</sub> and incubated at 37°C for 4 days.
