# Supplementary material for: NapA Mediates a Redox Regulation of the Antioxidant Response, Carbon Utilization and Development in Aspergillus nidulans
Source: PubMed Central journal article supplement (PMC5371717; doi:10.3389/fmicb.2017.00516), 2017-03-30
Supplement: Table2.pdf [file Table2.pdf]

**Table S2. *Aspergillus nidulans* strains used in this study**

| Strain                | Genotype                                                          | Source                                                            |
|-----------------------|-------------------------------------------------------------------|-------------------------------------------------------------------|
| FGSCA4                | <i>biA1</i>                                                       | FGSC                                                              |
| CLK43                 | <i>pabaA1 yA2 veA1</i>                                            | Kawasaki <i>et al.</i> , 2002                                     |
| A11035                | <i>pyrG89 pyroA4 riboB2 ΔnkuA::argB veA1</i>                      | M. Hynes, Nayak <i>et al.</i> , 2006                              |
| A1155                 | <i>pyrG89 pyroA4 ΔnkuA::bar veA1</i>                              | FGSC                                                              |
| CFL3                  | <i>pabaA1 yA2 pyrG89 veA1</i>                                     | Lara-Rojas <i>et al.</i> , 2011                                   |
| CFL7                  | <i>pabaA1 yA2 ΔnapA::AfpyrG veA1</i>                              | This work, progeny from CFL3 X TFL9                               |
| CreA <sup>d</sup> 204 | <i>pabaA1 yA2 creA<sup>d</sup>204 veA1</i>                        | P. González, progeny from CLK43 X MH440                           |
| MH440                 | <i>yA2 suA1adE20 adE20 riboB2 areA217 creA<sup>d</sup>204</i>     | M. Hynes                                                          |
| TRN1                  | <i>pabaA1 yA2 ΔargB::trpCΔB: ΔcatA::argB trpC801 veA1</i>         | Navarro <i>et al.</i> , 1996                                      |
| TLK12                 | <i>pabaA1 yA2 ΔargB::trpCΔB: ΔcatB::argB trpC801 veA1</i>         | Kawasaki <i>et al.</i> , 1997                                     |
| TFL9                  | <i>pyrG89 pyroA4 riboB2 ΔnapA::AfpyrG ΔnkuA::argB veA1</i>        | This work, 11035 transformed with PCR construct napA-AfpyrG-napA  |
| TFL14                 | <i>pyrG89 pyroA4 ΔnapA::AfpyrG ΔnkuA::argB veA1</i>               | This work, 1155 transformed with PCR construct napA-gfp-AfpyrG    |
| TFL15                 | <i>pyrG89 pyroA4 riboB2 ΔnapA::AfpyrG ΔnkuA::argB veA1</i>        | This work, 11035 transformed with PCR construct napA-AfpyrG-napA  |
| TFLΔatfA-04           | <i>pyrG89 pyroA4 riboB2 ΔatfA::AfriboB ΔnkuA::argB veA1</i>       | Lara-Rojas <i>et al.</i> , 2012                                   |
| TΔsrrA-pyrG9          | <i>pyrG89 pyroA4 riboB2 ΔsrrA::AfpryG ΔnkuA::argB veA1</i>        | Vargas-Pérez <i>et al.</i> , 2007                                 |
| TAM16                 | <i>pyrG89 pyroA4 riboB2 ΔgpxA::AfriboB ΔnkuA::argB veA1</i>       | This work, 11035 transformed with PCR construct gpxA-AfriboB-gpxA |
| TAM17                 | <i>pyrG89 pyroA4 riboB2 ΔtpxA::AfpyrG ΔnkuA::argB veA1</i>        | This work, 11035 transformed with PCR construct tpxA-AfpyrG-tpxA  |
| TAM19                 | <i>pyrG89 pyroA4 riboB2 ΔtpxB::AfRiboB ΔnkuA::argB veA1</i>       | This work, 11035 transformed with PCR construct tpxB-AfriboB-tpxB |
| TAM20                 | <i>pyrG89 pyroA4 riboB2 ΔalcA::AfRiboB ΔnkuA::argB veA1</i>       | This work, 11035 transformed with PCR construct alcA-AfriboB-alcA |
| COS SrrA3.1           | <i>pabaA1 yA2 ΔsrrA::AfpyrG veA1</i>                              | This work, progeny from TSrrAΔsskA X CLK56                        |
| CAM6                  | <i>pabaA1 yA2 ΔnapA::AfpryG ΔsrrA::AfpryG veA1</i>                | This work, progeny from CFL7 X TΔsrrA-pyrG9                       |
| CAM7                  | <i>pabaA1 yA2 ΔnapA::AfpryG ΔatfA::AfriboB veA1</i>               | This work, progeny from ΔatfA-04 X CAM6                           |
| CAM8                  | <i>pabaA1 yA2 ΔsrrA::AfpryG ΔatfA::AfriboB veA1</i>               | This work, progeny from ΔatfA-04 X CAM6                           |
| CAM9                  | <i>pabaA1 yA2 ΔsrrA::AfpryG ΔnapA::AfpyrG ΔatfA::AfriboB veA1</i> | This work, progeny from ΔatfA-04 X CAM6                           |
| CAM11                 | <i>pabaA1 yA2 ΔgpxA::AfriboB veA1</i>                             | This work, progeny from TAM16 X CLK43                             |

---

|        |                                                                                  |                                       |
|--------|----------------------------------------------------------------------------------|---------------------------------------|
| CAM12  | <i>pabaA1, yA2 ΔgpxA::AfriboB ΔtpxA::AfpvrG veA1</i>                             | This work, progeny from CAM11 X TAM17 |
| CAM13  | <i>pabaA1 yA2 ΔtpxA::AfpvrG veA1</i>                                             | This work, progeny from CAM11 X TAM17 |
| CAM14  | <i>pabaA1 yA2 ΔgpxA::AfriboB ΔtpxA::AfpvrG ΔnapA::AfpvrG veA1</i>                | This work, progeny from CAM12 X TFL9  |
| CAM15  | <i>pabaA1 yA2 ΔgpxA::AfriboB ΔtpxB::AfriboB ΔtpxB::AfpvrG veA1</i>               | This work, progeny from CAM12 X TAM19 |
| CAM16  | <i>pabaA1 yA2 ΔgpxA::AfriboB ΔtpxA::AfpvrG ΔtpxB::AfriboB ΔnapA::AfpvrG veA1</i> | This work, progeny from CAM14 X TAM19 |
| CAM17  | <i>pabaA1 yA2 ΔalcA::AfriboB veA1</i>                                            | This work, progeny from TAM20 X 11035 |
| CAM18  | <i>pabaA1 yA2 ΔalcA::AfriboB ΔnapA::AfpvrG veA1</i>                              | This work, progeny from CAM17 X TFL9  |
| COS440 | <i>pabaA1 yA2 ΔnapA::AfpvrG</i>                                                  | This work, progeny from CFL7 X FGSCA4 |
| COS441 | <i>pabaA1 yA2 ΔnapA::AfpvrG</i>                                                  | This work, progeny from CFL7 X FGSCA4 |

---
